# Supplementary material for: Epigenetic plasticity via adaptive DNA hypermethylation and clonal expansion underlie resistance to oncogenic pathway inhibition in pancreatic cancer
Source: bioRxiv or medRxiv preprint supplement (doi:10.1101/2022.05.20.492826), 2022-05-20
Supplement: Supplementary file [file media-3.pdf]

## Supplemental Table S1

Primer sequences used for targeted deep bisulfite sequencing of selected differentially methylated regions (DMRs). During oligonucleotide synthesis the following tag sequences were added to the 5' end of each forward and reverse primer: CTTGCTTCCTGGCACGAG (forward) and CAGGAAACAGCTATGAC (reverse)

| DMR  | Primer  | Sequence                     | PCR product location in mm10 |
|------|---------|------------------------------|------------------------------|
| 247  | forward | ATTTTATGGGTTAGTTGTTTGATTT    | chr10:99266158-99266419      |
|      | reverse | CAACTAATAACACTTTTAACACCC     |                              |
| 422  | forward | GTTTGTGGTAATTGGGGATTAGG      | chr11:113060998-113061290    |
|      | reverse | TCTAAAATACAACCCTACATATAAATC  |                              |
| 513  | forward | TTGTTAAATGGAATTGTTGTTGAGA    | chr12:85859330-85859634      |
|      | reverse | AAAACCTTACATAAACTACCAAAC     |                              |
| 711  | forward | TAAAGTAGTGGGATAAATTTTTTTT    | chr15:27467984-27468252      |
|      | reverse | CTAATCTTCTTATTCTTAACAAATCC   |                              |
| 825  | forward | AGATTAGTGTGTTTTAATTATTTGA    | chr16:23272009-23272213      |
|      | reverse | CCAAACAAAAACATCATACTTTC      |                              |
| 869  | forward | TTTTTTGTTTAAGGAAAGGATA       | chr16:92620511-92620772      |
|      | reverse | CCATTCTCAAAACAAATTTTAC       |                              |
| 929  | forward | TTGTAAGGTTGTATTTTTTTTGATGTTT | chr17:44718034-44718321      |
|      | reverse | CAACCCTTAAATACTAAAACCTCAACTC |                              |
| 963  | forward | TGGGAGGTAGTGTGGGATATAGTAG    | chr17:84141583-84141880      |
|      | reverse | CTTCCCAAAAACAAAACACTCTAA     |                              |
| 1144 | forward | AGGAGTGTGTTAATTTTTAGGGGTTA   | chr2:26501667-26501948       |
|      | reverse | CCCAACCAAATAAACCTACCTAA      |                              |
| 1211 | forward | ATTTGTTAGTATAGAAGAAGTTGGTAGT | chr2:102873250-102873543     |
|      | reverse | AACAAATTCTAAAAAAATTCCTC      |                              |
| 1232 | forward | TTTGTGTTAGGTTTTGTTTTTTGTTG   | chr2:127336828-127337044     |
|      | reverse | ATTCACACCATTACAAATCACAC      |                              |
| 1463 | forward | GTTGATTATTAGTTTTTTTTGTAGTT   | chr4:119244934-119245233     |
|      | reverse | CACATTTACACTAATATCCCAACC     |                              |
| 1602 | forward | TAGTAATATAAGATGTTTAAGTATTGAA | chr5:98943301-98943589       |
|      | reverse | AAAACCCACAAAACCTCTCTCTAA     |                              |
| 1823 | forward | AAAAGTTTTAGAGTGAGTAGAATAGGT  | chr7:24370317-24370596       |
|      | reverse | CTTACAACCCAAAAACCAAC         |                              |
| 1998 | forward | TAATTTTAGTATATGGGGAGTGGGA    | chr8:34813921-34814236       |
|      | reverse | TAACCATTCCCTTAAAAACACTACC    |                              |

### Supplemental Table S2

IC50 of trametinib in the parental cells based on averaged dose response curves.

| Cell line | IC50 [nM] | Replicates |
|-----------|-----------|------------|
| #1        | 25.2      | 2          |
| #2        | 9.4       | 2          |
| #3        | 10.9      | 3          |
| #4        | 11.2      | 3          |
| #5        | 12.9      | 2          |
| #6        | 16.3      | 3          |
| #7        | 14.3      | 3          |
| #8        | 5.3       | 2          |
| #9        | 55.2      | 3          |
| #10       | 10.9      | 3          |

**Supplemental Table S6**

Numbers (No.) of evaluated mitosis are displayed (NA, not available).

| No._mitosis | Karyotype_cell line #3 | Karyotype_cell line #9 |
|-------------|------------------------|------------------------|
| 1           | 76                     | 70                     |
| 2           | 79                     | 70                     |
| 3           | 78                     | 70                     |
| 4           | 74                     | 67                     |
| 5           | NA                     | 59                     |
| 6           | NA                     | 70                     |
| 7           | NA                     | 70                     |
| 8           | NA                     | 60                     |
| 9           | NA                     | 73                     |
| 10          | NA                     | 70                     |
| 11          | NA                     | 63                     |
| 12          | NA                     | 70                     |
